# Supplementary material for: Immune Contexture of MMR-Proficient Primary Colorectal Cancer and Matched Liver and Lung Metastases
Source: PubMed Central journal article supplement (PMC8037224; doi:10.3390/cancers13071530), 2021-03-26
Supplement: cancers-13-01530-s001.pdf [file cancers-13-01530-s001.pdf]

# Immune Contexture of MMR-Proficient Primary Colorectal Cancer and Matched Liver and Lung Metastases

Maarit Ahtiainen, Hanna Elomaa, Juha P. Väyrynen, Erkki-Ville Wirta, Teijo Kuopio, Olli Helminen, Toni T. Seppälä, Ilmo Kellokumpu and Jukka-Pekka Mecklin

**Table S1.** Comparison of the categorized immune variables between primary tumours and matched metastases.

|                           | Liver-only                       |                             | <i>P</i> -value | Both liver and lung              |                             | <i>P</i> -value | Lung-only                        |                             | <i>P</i> -value |
|---------------------------|----------------------------------|-----------------------------|-----------------|----------------------------------|-----------------------------|-----------------|----------------------------------|-----------------------------|-----------------|
|                           | Primary tumours<br><i>n</i> = 72 | Metastases<br><i>n</i> = 83 |                 | Primary tumours<br><i>n</i> = 18 | Metastases<br><i>n</i> = 53 |                 | Primary tumours<br><i>n</i> = 23 | Metastases<br><i>n</i> = 28 |                 |
| <b>PD-L1<sup>TC</sup></b> |                                  |                             |                 |                                  |                             |                 |                                  |                             |                 |
| low                       | 71 (99)                          | 80 (98)                     | 0.638           | 17 (100)                         | 51 (96)                     | 0.416           | 23 (100)                         | 27 (96)                     | 0.360           |
| high                      | 1 (1)                            | 2 (2)                       |                 | 0 (0)                            | 2 (4)                       |                 | 0 (0)                            | 1 (4)                       |                 |
| <b>PD-L1<sup>IC</sup></b> |                                  |                             |                 |                                  |                             |                 |                                  |                             |                 |
| low                       | 42 (52)                          | 39 (48)                     | 0.158           | 13 (77)                          | 20 (38)                     | <b>0.005</b>    | 14 (61)                          | 3 (11)                      | < <b>0.001</b>  |
| high                      | 30 (48)                          | 43 (52)                     |                 | 4 (23)                           | 33 (62)                     |                 | 9 (39)                           | 25 (89)                     |                 |
| <b>Immune cell score</b>  |                                  |                             |                 |                                  |                             |                 |                                  |                             |                 |
| Low (0-2)                 | 47 (68)                          | 40 (50)                     | <b>0.025</b>    | 12 (67)                          | 26 (54)                     | 0.360           | 14 (64)                          | 12 (46)                     | 0.351           |
| High (3-4)                | 22 (32)                          | 40 (50)                     |                 | 6 (33)                           | 22 (46)                     |                 | 8 (36)                           | 14 (54)                     |                 |
| <b>Immunoprofile</b>      |                                  |                             |                 |                                  |                             |                 |                                  |                             |                 |
| 0                         | 27 (39)                          | 19 (24)                     | <b>0.045</b>    | 6 (35)                           | 12 (24)                     | 0.128           | 8 (36)                           | 1 (4)                       | <b>0.009</b>    |
| 1                         | 11 (16)                          | 23 (29)                     |                 | 8 (47)                           | 14 (29)                     |                 | 6 (27)                           | 8 (33)                      |                 |
| 2                         | 19 (28)                          | 16 (20)                     |                 | 2 (12)                           | 6 (12)                      |                 | 5 (23)                           | 3 (13)                      |                 |
| 3                         | 12 (17)                          | 22 (27)                     |                 | 1 (6)                            | 17 (35)                     |                 | 3 (14)                           | 12 (50)                     |                 |

Abbreviations: PD-1, programmed cell death protein 1; PD-L1, programmed death ligand 1; TC, tumour cell; IM, invasive margin; IC, immune cell. Because of indeterminable samples either in CD3, CD8, PD-1 or PD-L1, sample numbers in Immune cell score and Immunoprofile do not completely correspond to the total sample number.
